# Supplementary material for: Association between Renal Function at Admission and COVID-19 in-Hospital Mortality in Southern Italy: Findings from the Prospective Multicenter Italian COVOCA Study
Source: MDPI journal article supplement (doi:10.3390/jcm11206121), 2022-10-17
Supplement: s1 [file s1]

# Supplementary Materials

**Table S1.** Univariable Cox's regression models.

| Parameter                                     | Univariable Analysis |        |       |        |
|-----------------------------------------------|----------------------|--------|-------|--------|
|                                               | HR                   | 95% CI |       | p      |
| <b>Age</b>                                    | 1.06                 | 1.05   | 1.07  | <0.001 |
| <b>Sex</b>                                    |                      |        |       |        |
| <i>M (ref)</i>                                | 1                    |        |       |        |
| <i>F</i>                                      | 1.02                 | 0.79   | 1.32  | 0.86   |
| <b>Body temp</b>                              | 0.96                 | 0.83   | 1.12  | 0.62   |
| <b>Respiratory rate</b>                       | 1.11                 | 1.09   | 1.14  | <0.001 |
| <b>Heart rate</b>                             | 1.01                 | 1.00   | 1.02  | 0.07   |
| <b>Systolic BP</b>                            | 1.00                 | 0.99   | 1.00  | 0.25   |
| <b>Diastolic BP</b>                           | 0.97                 | 0.96   | 0.99  | <0.001 |
| <b>Oxygen saturation</b>                      | 0.94                 | 0.92   | 0.95  | <0.001 |
| <b>ARDS Scale</b>                             |                      |        |       |        |
| <i>Absent (ref)</i>                           | 1                    |        |       |        |
| <i>Mild</i>                                   | 2.15                 | 1.29   | 3.58  | 0.003  |
| <i>Moderate</i>                               | 3.26                 | 2.00   | 5.33  | <0.001 |
| <i>Severe</i>                                 | 8.46                 | 5.38   | 13.32 | <0.001 |
| <i>Missing</i>                                | 4.05                 | 2.42   | 6.77  | <0.001 |
| <b>GCS/15</b>                                 |                      |        |       |        |
| <i>Mild impaired consciousness (ref)</i>      | 1                    |        |       |        |
| <i>Moderate/Severe impaired consciousness</i> | 8.03                 | 5.22   | 12.35 | <0.001 |
| <i>Missing</i>                                | 1.63                 | 1.15   | 2.32  | 0.006  |
| <b>Respiratory Severity Scale</b>             |                      |        |       |        |
| <i>None (ref)</i>                             | 1                    |        |       |        |
| <i>Mask/Glasses/Cannula</i>                   | 3.29                 | 1.86   | 5.82  | <0.001 |
| <i>NIV</i>                                    | 3.90                 | 2.19   | 6.97  | <0.001 |
| <i>OTI</i>                                    | 30.47                | 15.49  | 59.91 | <0.001 |
| <b>Chronic Cardiac Disease</b>                | 2.65                 | 2.06   | 3.41  | <0.001 |
| <b>CKD</b>                                    | 3.33                 | 2.47   | 4.49  | <0.001 |
| <b>Hypertension</b>                           | 1.65                 | 1.25   | 2.16  | <0.001 |
| <b>Diabetes</b>                               | 1.73                 | 1.33   | 2.26  | <0.001 |
| <b>Smoking</b>                                | 1.70                 | 1.15   | 2.49  | 0.007  |
| <b>CLD</b>                                    | 0.96                 | 0.54   | 1.71  | 0.89   |
| <b>Chronic Respiratory Disease</b>            | 2.27                 | 1.72   | 3.00  | <0.001 |
| <b>Chronic Neurological Disorder</b>          | 1.64                 | 1.14   | 2.35  | 0.01   |
| <b>Malignancies</b>                           | 1.33                 | 0.91   | 1.93  | 0.13   |
| <b>Cortison</b>                               | 1.13                 | 0.63   | 2.02  | 0.67   |
| <b>Monoclonal Abs</b>                         | 1.11                 | 0.62   | 2.00  | 0.72   |
| <b>Antivirals</b>                             | 0.24                 | 0.16   | 0.37  | <0.001 |
| <b>Stages of filtrate</b>                     |                      |        |       |        |
| <i>1 (ref)</i>                                | 1                    |        |       |        |
| <i>2</i>                                      | 2.60                 | 1.78   | 3.80  | <0.001 |
| <i>3</i>                                      | 5.66                 | 3.79   | 8.43  | <0.001 |
| <i>4</i>                                      | 9.82                 | 6.01   | 16.04 | <0.001 |
| <i>5</i>                                      | 14.04                | 8.86   | 22.25 | <0.001 |

**Abbreviations:** M: Male; F: Female; Abs: Antibodies; ARDS: Acute Respiratory Distress Syndrome; Body temp: body temperature; GCS: Glasgow Coma Score; RSS: Respiratory Severity Scale; NIV: Non-invasive ventilation; OTI: Orotracheal Intubation; CKD: Chronic Kidney Disease; CLD: Chronic Liver Disease; eGFR: estimated glomerular filtration rate; Malign: Malignancies. **Chronic cardiac diseases** (ischemic cardiopathy, previous acute myocardial infarction (AMI), heart failure, valvulopathy and atrial fibrillation); **CKD** (chronic renal failure, glomerulonephritis and dialysis), **chronic respiratory diseases** (Chronic obstructive pulmonary disease, asthma, lung fibrosis), **CLD** (chronic hepatopathy from HCV and HBV, cirrhosis, NAFLD).
